# Supplementary material for: Use of Wild Relatives in Durum Wheat (Triticum turgidum L. var. durum Desf.) Breeding Program: Adaptation and Stability in Context of Contrasting Environments in Tunisia
Source: MDPI journal article supplement (doi:10.3390/agronomy11091782), 2021-09-06
Supplement: s1 [file s1]

## Supplementary Materials

**Table S1.** Grain yield of the 25 genotypes across the six tested environments followed by the analysis of variance (ANOVA).

| Line                  | Grain yield (t ha <sup>-1</sup> ) |            |            |           |           |            | Mean |
|-----------------------|-----------------------------------|------------|------------|-----------|-----------|------------|------|
|                       | Kef_15                            | Kef_16     | Kef_17     | Kef_18    | Beja_19   | Beja_16    |      |
| 1                     | 3.18                              | 1.79       | 1.67       | 2.00      | 2.56      | 2.63       | 2.31 |
| 2                     | 2.49                              | 1.99       | 0.96       | 1.77      | 1.96      | 2.65       | 1.97 |
| 3                     | 2.85                              | 1.66       | 1.22       | 1.55      | 2.18      | 2.83       | 2.05 |
| 4                     | 3.04                              | 1.95       | 1.66       | 1.41      | 1.85      | 2.66       | 2.09 |
| 5                     | 4.14                              | 2.08       | 1.26       | 1.66      | 1.81      | 3.24       | 2.37 |
| 6                     | 3.51                              | 1.87       | 1.06       | 1.21      | 2.03      | 2.44       | 2.02 |
| 7                     | 3.79                              | 1.69       | 1.27       | 1.79      | 1.72      | 2.48       | 2.12 |
| 8                     | 3.38                              | 1.45       | 0.85       | 1.73      | 2.23      | 2.90       | 2.09 |
| 9                     | 3.54                              | 2.44       | 0.96       | 1.74      | 2.22      | 3.57       | 2.41 |
| 10                    | 3.59                              | 2.36       | 1.19       | 1.52      | 1.91      | 3.11       | 2.28 |
| 11                    | 3.82                              | 1.68       | 1.08       | 1.55      | 1.66      | 2.62       | 2.07 |
| 12                    | 3.99                              | 2.34       | 0.68       | 1.20      | 2.11      | 2.95       | 2.21 |
| 13                    | 3.48                              | 2.54       | 0.43       | 1.48      | 1.93      | 2.46       | 2.05 |
| 14                    | 3.76                              | 1.90       | 0.15       | 1.67      | 2.39      | 2.97       | 2.14 |
| 15                    | 3.39                              | 2.16       | 0.32       | 1.64      | 1.69      | 2.47       | 1.95 |
| 16                    | 3.32                              | 1.57       | 1.50       | 1.74      | 1.95      | 2.29       | 2.06 |
| 17                    | 3.23                              | 1.23       | 0.73       | 1.45      | 2.43      | 2.92       | 2.00 |
| 18                    | 3.36                              | 2.29       | 0.70       | 1.72      | 2.24      | 2.72       | 2.17 |
| 19                    | 3.33                              | 1.63       | 1.43       | 1.66      | 1.82      | 2.94       | 2.14 |
| 20                    | 4.52                              | 1.93       | 1.15       | 1.41      | 1.97      | 2.39       | 2.23 |
| 21                    | 3.31                              | 2.10       | 1.30       | 1.48      | 2.26      | 2.81       | 2.21 |
| 22                    | 2.43                              | 1.28       | 1.33       | 1.92      | 1.92      | 3.77       | 2.11 |
| 23                    | 2.89                              | 2.56       | 1.66       | 1.55      | 2.30      | 3.08       | 2.34 |
| 24                    | 2.23                              | 2.36       | 1.32       | 1.33      | 2.29      | 2.64       | 2.02 |
| 25 (Salim)            | 2.83                              | 2.54       | 1.51       | 2.08      | 1.72      | 2.62       | 2.21 |
| Elites                | 3.43                              | 2.04       | 1.22       | 1.57      | 2.09      | 3.07       | 2.24 |
| Commercial varieties  | 3.33                              | 1.80       | 1.17       | 1.70      | 2.02      | 2.58       | 2.10 |
| Wild relative-derived | 3.33                              | 1.95       | 0.98       | 1.57      | 2.06      | 2.75       | 2.10 |
| Elites                |                                   |            | 2.06       |           |           | 2.58       |      |
| Commercial varieties  |                                   |            | 2.00       |           |           | 2.30       |      |
| Wild relative-derived |                                   |            | 1.96       |           |           | 2.40       |      |
| Genotype variance     | 352 937.52                        | 185 783.87 | 177 049.96 | 69 036.12 | 94 723.66 | 144 705.22 |      |
| Residual variance     | 157 815.80                        | 65 627.28  | 7 333.51   | 52 985.04 | 84 090.49 | 38 690.31  |      |
| Grand mean            | 3 337.75                          | 1 977.41   | 1 096.56   | 1 610.08  | 2 044.64  | 2 807.06   |      |
| LSD                   | 776.06                            | 539.77     | 200.36     | 429.03    | 539.89    | 384.18     |      |
| CV (%)                | 11.90                             | 12.96      | 7.81       | 14.30     | 14.18     | 7.01       |      |
| Heritability          | 0.82                              | 0.85       | 0.98       | 0.72      | 0.69      | 0.88       |      |

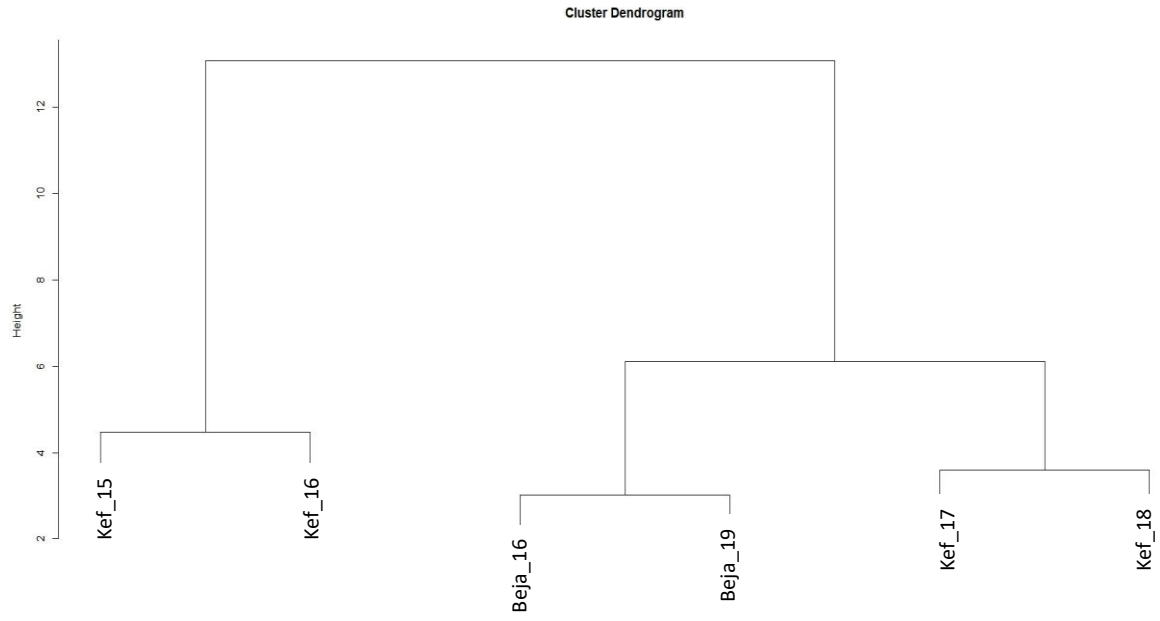

**Figure S1.** Classification of the **six** environments based on grain yield.

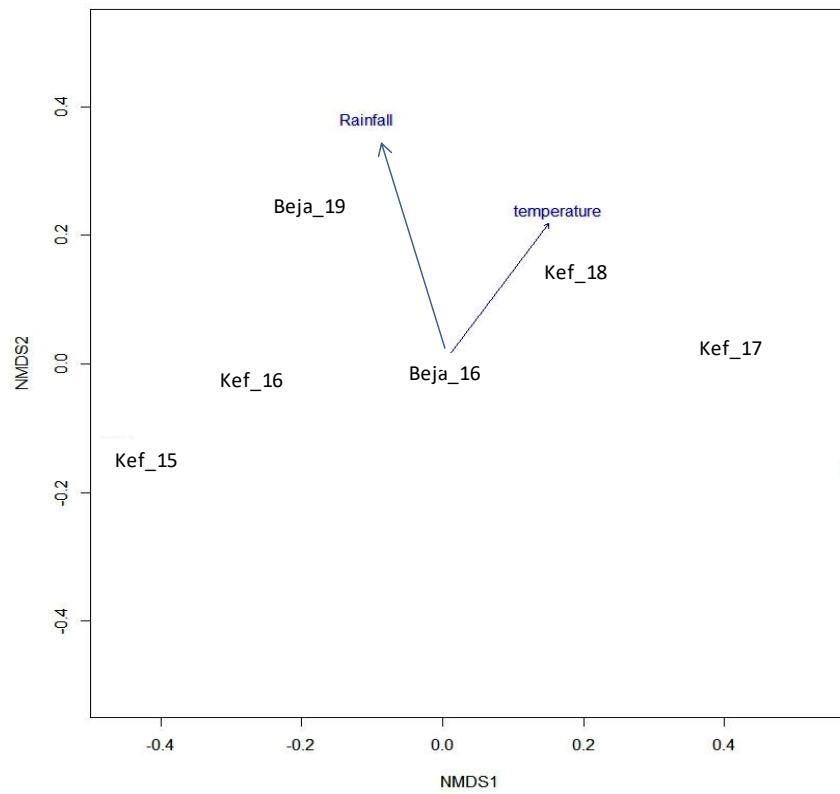

**Figure S2.** NMDS analysis of climate variables including temperature ( $^{\circ}\text{C}$ ) and rainfall (mm) characterizing the six environments, used to assess the grain yield.
